1     ***“When a man drinks alcohol it’s cool but when a woman drinks she is a hoe”*: A Qualitative**  
2             **Exploration of Alcohol, Gender, Stigma, and Sexual Assault in Moshi, Tanzania**

3

4     **Authors and affiliations:**

5     Alena Pauley<sup>1</sup> – [alena.pauley@duke.edu](mailto:alena.pauley@duke.edu) (ORCID#: 0000-0002-7489-7469)

6     Madeline Metcalf<sup>1</sup> – [madeline.metcalf@duke.edu](mailto:madeline.metcalf@duke.edu)

7     Mia Buono<sup>1</sup> – [mia.buono@duke.edu](mailto:mia.buono@duke.edu)

8     Sharla Rent, MD MScGH<sup>1,2</sup> - [Sharla.Rent@duke.edu](mailto:Sharla.Rent@duke.edu)

9     Mariana Mikindo<sup>3</sup> – [mirianamikindo@gmail.com](mailto:mirianamikindo@gmail.com)

10    Yvonne Sawe<sup>3</sup> – [yvonneseawe90@gmail.com](mailto:yvonneseawe90@gmail.com)

11    Joseph Kilasara<sup>3,4</sup> APRN MNS-FNP – [joseph.kilasara@kcmuco.ac.tz](mailto:joseph.kilasara@kcmuco.ac.tz)

12    Judith Boshe MD MMED<sup>3,5</sup> – [jboshe@live.com](mailto:jboshe@live.com)

13    ^Catherine A. Staton, MD MScGH<sup>1,6</sup> – [catherine.staton@duke.edu](mailto:catherine.staton@duke.edu)

14    ^Blandina T. Mmbaga, MD PhD<sup>1,3,5</sup> – [blaymt@gmail.com](mailto:blaymt@gmail.com)

15

16    1 Global Emergency Medicine Innovation and Implementation Research Center, Duke Global

17    Health Institute, Duke University, Durham, NC USA

18    2 Duke Department of Pediatrics, Duke University Medical Center, Durham, NC USA

19    3 Kilimanjaro Christian Medical Center, Moshi, Tanzania

20    4 Department of Clinical Nursing, Kilimanjaro Christian Medical University College, Moshi,

21    Tanzania

22    5 Kilimanjaro Clinical Research Institute, Moshi, Tanzania

23    6 Duke Department of Emergency Medicine, Duke University Medical Center, Durham, NC

24    USA

25 **^Mmbaga and Staton Co-Corresponding authors**

26

27 **Corresponding Authors in event of publication:** catherine.lynch@duke.edu (CAS) and

28 [blaymt@gmail.com](mailto:blaymt@gmail.com) (BTM)

29

30 *Funding:* This project was funded by the Duke Global Health Institute Graduate Student funds

31 and the Josiah Trent Foundation. Infrastructure built by NIH grant R01 AA027512 (PI Staton)

32 was used to support the data collection process for this grant to understand gender-related aspects

33 of alcohol use at KCMC.

34 *Competing interests:* The authors declare no competing interests.

35

36 **Author contributions:**

37 Conceptualization: AMP, CAS, BTM, JB

38 Methodology: AMP, CAS

39 Formal analysis and investigation: CAS, BTM, JB

40 Data Collection: MMi, JK, YS, AMP

41 Writing - original draft preparation: AMP, MB, MM

42 Writing - review and editing: SR, AMP, MB, MM, CAS

43 Funding acquisition: AMP, CAS

44 Supervision: CAS, SR, BTM

## 45 *Abstract*

46 **Background:** Alcohol's ever-increasing global use poses a distinct threat to human well-being,  
47 with intake and associated burdens rising especially quickly in low- and middle-income countries  
48 like Tanzania. Prior research has shown alcohol use and related consequences differ by gender in  
49 Moshi, Tanzania, with important implications for both clinical care and future alcohol-reduction  
50 interventions. This study builds upon this knowledge by providing a deeper understanding of  
51 how gender differences affect alcohol-related stigma and sexual assault among Emergency  
52 Department (ED) and Reproductive Health Center (RHC) patients at Kilimanjaro Christian  
53 Medical Center (KCMC) in Moshi.

54 **Methods:** In-depth interviews (IDIs) were conducted among ED and RHC KCMC patients (n =  
55 19) selected for participation via purposive sampling. A mix of inductive and deductive coding  
56 schemes was used to identify themes and subthemes. All data were analyzed through a grounded  
57 theory approach.

58 **Results:** Gender roles that linked men with financial responsibilities and women with child  
59 caretaking led to different expectations on alcohol intake, with alcohol use normalized for men  
60 but vilified for women. Women who drank, for example, were deemed poor mothers and  
61 undesirable spouses. Patients likewise emphasized that both alcohol-related stigma and sexual  
62 violence disproportionately impacted women, the latter fueled through alcohol use, with serious  
63 and lasting acts of discrimination and isolation from community members seen among women  
64 alcohol users but not for men.

65 **Conclusion:** Women alcohol users in Moshi are subject to severe social consequences, facing  
66 disproportionate stigma and sexual violence as compared to men. Alcohol-related treatment for

67 women should be mindful of the disproportionate burdens present in this context and incorporate  
68 strategies to address and/or mitigate these harms in subsequent care and interventions.

69 **Keywords:** Alcohol; Tanzania; Gender; Stigma; Sexual Violence; Sexual Assault; Alcohol-

70 Related Harm

## 71 *Introduction*

72 Alcohol is a significant and growing threat to human health, implicated in 1 in 20 deaths  
73 worldwide and accounting for 5.1% of the global burden of disease and injury annually (1). In  
74 recent years, low- and middle-income countries (LMICs) have been facing exceptionally rapid  
75 increases in consumption and ensuing harm, with alcohol now established as the leading cause of  
76 disease burden in many Sub-Saharan African countries (2,3). Alcohol use behaviors in Africa are  
77 also among the most hazardous worldwide, with this region having especially high rates of binge  
78 drinking and alcohol dependence that produce greater health risks than moderated intake (2,4,5).  
79 While already concerning, harm is concentrated more still in countries like Tanzania, which have  
80 almost twice the incidence of heavy episodic drinking and alcohol use disorder than neighboring  
81 Kenya or Mozambique (1). In Northern Tanzania, excessive intake is fueled in part by social  
82 customs that promote alcohol use from a young age, combined with alcohol's low cost, rising  
83 levels of disposable income, and ready availability (6).

84 Gender is an essential modifier in examining risk factors of disease and injury, clinical  
85 progression, and responses to treatment across a wide range of health conditions, including  
86 alcohol abuse (7,8). As follows, treatment options should integrate biological and sociocultural  
87 gender nuances in order to effectively provide care (9–12). The need to consider gender in health  
88 is heightened in many LMICs, given women's more vulnerable social status (13–15). In these  
89 contexts, women often are relegated to unpaid household and child caretaking responsibilities  
90 and have less decision-making power, education, employment opportunities, and access to  
91 healthcare services than their male counterparts (16–18). These stringent socially enacted  
92 distinctions between men and women in some LMICs make it even more important to consider  
93 gender differences in creating more effective alcohol-reduction programs and clinical treatments.

94           Looking at gender and alcohol use worldwide, men are known to consume more alcohol  
95   and account for three times more alcohol-related harm to themselves and others (19–22). Men  
96   are also more likely to be diagnosed with alcohol use disorder (AUD) in their lifetime (23),  
97   hospitalized for alcohol poisoning (24), die in traffic crashes involving alcohol (25), and die from  
98   other alcohol-related causes (21). On the other hand, women are disproportionately burdened  
99   with chronic health harms, including more rapid alcohol-related cognitive decline and brain  
100   atrophy (9), and greater susceptibility to alcohol-induced liver disease (26), cardiovascular  
101   disease (9), and certain cancers (27–29). In many settings, women also face greater social  
102   consequences related to alcohol use, including heightened stigma (30), discrimination, and  
103   sexual violence (31).

104           The stigma around substance use disorders is an especially notable gendered consequence  
105   as it stands as a barrier to treatment delivery (32,33). Past research based in Moshi, an urban  
106   town in Northern Tanzania, has found that gendered differences underlying alcohol-related  
107   stigma exist and disproportionately burden women (30). This is concerning given that stigma is  
108   an established barrier to treatment, thus potentially hindering women in this region, especially,  
109   from receiving needed care. The stigma surrounding women’s alcohol use in Tanzania has also  
110   been interlinked here with sexual assault; for example, a Dar es Salaam-based study has found  
111   that women who drink alcohol are perceived to lack morals and are considered prostitutes  
112   regardless of their occupation (34). Alcohol abuse among women in Moshi has also been  
113   associated with a history of sexual violence and a greater incidence of testing positive for  
114   sexually transmitted diseases (STDs) (35).

115           Beyond these effects, alcohol use in Moshi is high, with some sources estimating intake  
116   to be 2.5 times higher here as compared to nearby regions (36–38). This high use combined with

117 the lack of resources and trained professionals dedicated to alcohol-related care (39,40) point to  
118 an urgent need for effective alcohol-reduction interventions in this area. To make these programs  
119 effective for both men and women, gender differences in alcohol use and alcohol-related harms  
120 should be considered. Literature discussing how these harms may differ by gender, particularly  
121 in LMICs, is sparse. Further, the relationship between gender, stigma, and sexual assault is  
122 nuanced and complex, a qualitative exploration of these themes is needed to better understand  
123 the specific impacts of alcohol use. This paper aims to fill these gaps by first examining  
124 gendered expectations of alcohol use and then exploring men's and women's differentiated  
125 experiences with alcohol-related stigma and sexual violence in Moshi, Tanzania.

## 126 *Methods*

### 127 *Study Design*

128 Beginning in October 2021 and ending in May 2022, data focused on understanding  
129 gender differences in alcohol consumption was collected from Emergency Department (ED) and  
130 Reproductive Health Center (RHC) patients presenting for care at the Kilimanjaro Christian  
131 Medical Center (KCMC) in Moshi, Tanzania. This manuscript stems from a larger mixed-  
132 methods study of alcohol use in Moshi, Tanzania (41). In this analysis, we use qualitative data  
133 gathered from in-depth interviews to focus on gender, stigma, and sexual assault. In total, 19  
134 IDIs were collected through purposeful sampling from ED and RHC patients who previously  
135 completed surveys.

### 136 *Setting*

137 Moshi is an urban town set in Northern Tanzania, bordering Mount Kilimanjaro National  
138 Park and Kenya. KCMC, located in Moshi, functions as the referral hospital to over 11 million  
139 people (42,43). KCMC's ED and RHC were chosen as the two clinical sites for participant  
140 sampling to better elucidate 1) risky alcohol use behaviors and 2) gender differences in alcohol  
141 use.

142 Alcohol use is a well-defined risk factor for injuries, especially injuries prompting ED  
143 visits (44,45). A previous study by our group established that this holds true within Moshi: 30%  
144 of injury patients tested positive for alcohol use upon presentation to KCMC's ED for care (46).  
145 Given that KCMC's ED cares for a patient population with known risky alcohol use behaviors, it  
146 served as an ideal location to better study alcohol-related harms, and so was chosen as one of the  
147 main clinical sites for this study. The RHC at KCMC is the referral unit for all obstetric and



148 gynecological issues in Moshi and its surrounding areas. The RHC's patient population, which  
149 consists entirely of females, allowed for data collection to occur in a safe, gynocentric  
150 environment to facilitate the open and honest sharing of women's thoughts and experiences with  
151 alcohol use. An incidental advantage in using this location as a study site is it allowed us to  
152 incorporate women with less extreme alcohol use behaviors, as women seeking prenatal or  
153 antenatal care typically had reduced alcohol intake.

#### 154 *Research Team and Reflexivity*

155         The research team based in Tanzania consisted of two female (YS and MM) and one  
156 male (JK) research assistant. This team was overseen on the ground by one physician-researcher  
157 (BM) with extensive previous experience in alcohol-related and epidemiology-focused research.  
158 All three research assistants were born and raised in Tanzania, fluent in both Kiswahili and  
159 English, had obtained a college degree or higher, had previous experience working in research,  
160 formal training in qualitative research practices, and held the strong interpersonal skills needed  
161 for conducting an IDI that addressed potentially sensitive topics such as stigma or sexual abuse.  
162 The Tanzanian team was supported by partners in the US with expertise relevant to emergency  
163 medicine, alcohol use disorders, and qualitative data analysis.

#### 164 *Participant Selection and Sample Size*

165         Enrolled individuals met the following criteria: 1) received initial care at KCMC's RHC  
166 or ED, 2) were 18 years of age or older, 3) were conversant in Kiswahili, 4) had the capacity to  
167 give informed consent, and 5) were not prisoners. A purposive sampling strategy was employed  
168 to select an anticipated 20 interview candidates, or until saturation was reached, from the 678  
169 patients who had first completed quantitative surveys within the larger study. Twenty IDIs were  
170 initially anticipated, given that saturation is typically reached at 20 interviews in studies with

171 narrow aims (47). For this project specifically, five ED women patients, five RHC women  
172 patients, and ten ED men patients were targeted to achieve a gender-balanced perspective in  
173 collected data, and saturation was defined as a dearth of new information or themes after three  
174 consecutive interviews. Saturation was reached for the ED men category at 9 interviews, after  
175 which data collection ceased, so in total, 19 IDIs were completed.

176 Patients were purposefully selected for participation in IDIs to represent varied 1)  
177 sociodemographic statuses including age, income, profession, marital status, and religion, 2)  
178 levels of alcohol intake, and 3) perspectives on and experiences with alcohol. The study lead  
179 assessed IDI patient characteristics en masse monthly during the data collection timeline to  
180 ensure the sample remained representative of these targeted attributes. Any needed modifications  
181 were implemented immediately following these reviews.

## 182 *Participant Recruitment and Interview Procedure*

183 As alcohol use in Moshi is known to be stigmatized, one-on-one semi-structured IDIs  
184 were chosen as the method for qualitative data collection to encourage participants, especially  
185 women, to be able to speak freely about alcohol use while also maintaining their privacy. IDI  
186 participation was introduced to eligible patients either at the conclusion of their quantitative  
187 survey or in a later phone call. If a patient was interested and willing to participate, a later  
188 appointment to meet was scheduled at the patient's convenience. All interviews were completed  
189 in quiet rooms at KCMC with only the patient and the research assistant present, and with both  
190 members of this pair identifying as the same gender. This gender-matching was done to foster  
191 patients' truthful reporting of their opinions on alcohol use. Interviews were all conducted in  
192 Kiswahili, generally lasted from an hour to an hour and a half, and were digitally audio-recorded

193 and later translated into English. Participants were given a small stipend to reimburse travel costs  
194 and offered snacks midway through their interview.

195 IDIs were semi-structured, using an interview guide that had been organized across the  
196 following six domains: 1) community perspectives and expectations of alcohol use, 2) men's  
197 alcohol use, 3) women's alcohol use, 4) differences in alcohol use between men and women, 5)  
198 alcohol use during pregnancy, and 6) participant's recommendations for future alcohol-reduction  
199 programs and interventions. If content arose during the IDI that was either confusing,  
200 contradictory to a previous statement, or especially notable, the interviewer asked probing  
201 follow-up questions to better elucidate the patient's meaning or expand upon a unique experience  
202 with alcohol. The interview guide had been first developed in English using a team-based  
203 approach in collaboration with both the US and Tanzanian research teams, was translated into  
204 Kiswahili, reviewed for cultural appropriateness, pilot tested, and revised into its final form.

### 205 *Data Analysis*

206 A grounded theory approach was employed in this analysis to allow new themes and  
207 ideas to arise organically, given that this topic has been sparsely studied in this particular setting  
208 (48). A first draft of our codebook was deductively and inductively developed once the first four  
209 interviews had been completed. This document was extensively discussed and reviewed, with  
210 subsequent changes made to maintain cultural relevance and accuracy to the codebook while also  
211 ensuring content validity. The codebook was updated as novel themes surfaced through the  
212 collection of the remaining 15 IDIs.

213 The main analyst, AP, provided training to YS, MM, and JK on interview coding. All  
214 members of this group independently coded the initial interviews, meeting after each interview  
215 was coded to compare coding strategies and maintain coding consistency. Any differences that

216 arose were discussed among this group until a unanimous agreement was reached. The coding  
217 team replicated this process for each consecutive interview until 80% agreement was obtained.  
218 After this point, the main analyst then used the codebook to complete the coding of all remaining  
219 interviews, a decision approved by the research team. As noted in our other publication, while  
220 this analysis is centered on examining gender differences, participants self-identified by  
221 biological sex (41). As Tanzania is reported to hold little gender diversity, patients identifying as  
222 female were categorized as women, and those identifying as male were categorized as men.

223         Given the many existing definitions and types of stigma in relation to mental health and  
224 substance abuse, in this study, we defined stigma as the negative and often unfair beliefs  
225 surrounding a specific population or attributable to a certain characteristic – here, alcohol users  
226 and alcohol use. Perceived and experienced stigma were the two main types that emerged in  
227 IDIs. *Perceived stigma* is one’s beliefs on how the community views a certain attribute (49),  
228 surfacing in this study when participants described alcohol-related stigma’s presence in their  
229 community and compared its power between genders. In contrast, *experienced stigma* refers to  
230 concrete encounters with any stigmatizing behaviors and beliefs (50). This arose in patients’ re-  
231 telling of friends, relatives, or acquaintances’ lived experiences with alcohol-related stigma.

### 232 *Ethics Statement*

233         The Tanzanian National Institute of Medical Research, Duke University Institutional  
234 Review Board, and Kilimanjaro Christian Medical University College Ethical Review Board all  
235 granted ethical approval for this study prior to the start of data collection. Data was de-identified  
236 as much as possible and shared through a data share agreement. While personal health  
237 information was utilized in screening and enrollment processes, data was de-identified when  
238 collected, stored, and analyzed.

## 239 *Results*

240 Nineteen IDIs were collected from participants whose demographics spanned a wide  
241 range of age, income, and education statuses, along with differing levels of alcohol intake as  
242 previously documented (41). The interplay of gender on alcohol-related stigma and sexual  
243 violence was explored with a focus on elucidating the differences between men's and women's  
244 experiences. The analysis yielded four main themes: Gender Roles, Alcohol's Impact on  
245 Gendered Responsibilities and Family Life, Alcohol-Related Stigma, and Alcohol and Sexual  
246 Violence (Table 1). In the first theme, men were perceived to play a financial support role, while  
247 women held primary childcare responsibilities in a traditional household. These roles led to  
248 unique social expectations for alcohol intake and fostered more negative connotations around  
249 women who drank, such as the perception that they would be poor mothers and undesirable to  
250 marry. Alcohol-related stigma and sexual assault were likewise found to disproportionately  
251 burden women, leading to social isolation and a perception that women who drink are able and  
252 prone to be sexually assaulted. Finally, alcohol was noted as an accelerant through which men  
253 could facilitate sexual advances with women, using alcohol to remove women's inhibitions, limit  
254 their decision-making capacities, and encourage risky behaviors.

255

*Table 1: Themes and Sub-themes*

| <b>Themes</b>                                                 | <b>Sub-themes</b>                                                        |
|---------------------------------------------------------------|--------------------------------------------------------------------------|
| Gender Roles                                                  | Traditional responsibilities for men and women                           |
|                                                               | Dissimilar expectations for alcohol intake                               |
| Alcohol's Impact on Gendered Responsibilities and Family Life | Women who drink are perceived as poor mothers                            |
|                                                               | Men who drink but can still provide financially face less social censure |
|                                                               | Women who drink are undesirable to marry                                 |
| Alcohol-related Stigma                                        | Women face more severe alcohol-related stigma than men                   |
|                                                               | Lack of discrimination and isolation surround men who drink              |
|                                                               | Discrimination and isolation surrounding women who drink                 |
|                                                               | Community support and implications on women's health                     |
|                                                               | Stigma's influence on sexual violence                                    |
| Alcohol and Sexual Violence                                   | Women face disproportionate alcohol-related sexual harm                  |
|                                                               | Alcohol is used as a tool to advance sexual acts                         |
|                                                               | Women's alcohol use is associated with sex work                          |

256 ***Gender Roles***

257           While never formally asked during interviews, sociocultural gender roles were  
 258 nevertheless a prevailing theme noted to underlie the gendered consequences of alcohol use.  
 259 While these norms did not apply equally to all individuals in Moshi, the presence of this theme in  
 260 most IDIs, especially unsolicited, suggests an enduring social significance. As explored below,

261 men's and women's different responsibilities within a traditional Moshi household fostered  
262 dissimilar community expectations for their behavior and alcohol intake.

263

#### 264 Traditional responsibilities for men and women

265 Men were described as having a “*responsibility to look after the family by seeking*  
266 *money*” (IDI #13, Female), and were seen to shoulder most of the fiscal responsibilities for  
267 families in Moshi. This was achieved through outside employment, physically removing them  
268 from the home, to ensure the financial “*protection*” and “*provision*” of their households – “*for*  
269 *the most part family responsibilities especially involving money are of a man*” (IDI #8, Male).

270 In contrast, respondents expressed that women's roles lay in safeguarding home and  
271 family life, especially as it relates to caring for their children. Women, in general, were seen as  
272 “*responsible for rearing children*” (IDI#12, Male), “*pillars in the family*” (IDI#3, Female), and  
273 “*under men's authority*” (IDI #4, Male). Others described women as the “*passer of family norms*  
274 *and love*”; “*in most families, women are the one taking care of children*” (IDI #8, Male). In  
275 opposition to men, this child-caretaking role physically tied women to their homes but also  
276 provided them with little free time as this job requires near constant time and attention.

277 Building on this sentiment, one participant mentioned that higher, potentially unrealistic,  
278 expectations exist for women:

279 “*Our African society has a picture of a very perfect woman with no any kind of flaw, they*  
280 *consider a woman should be very perfect in everything in order to be a woman in the*  
281 *eyes of the society forgetting that even women are human beings too and no human is*  
282 *perfect. And having flaws doesn't make one less a woman but unfortunately, our society*  
283 *doesn't understand that*” (IDI #10, Female).

284

285 Dissimilar expectations for alcohol intake

286           These gender roles directed many participants' belief that men and women should drink  
287 different amounts of alcohol. In particular, it was thought that women should drink less because  
288 alcohol consumption prevented women's childcare responsibilities from being fulfilled – *“the*  
289 *effects tend to be [more] severe to women than to men, because women have more sensitive roles*  
290 *in community development specifically in raising children and family”* (IDI #7, Female). As  
291 summarized by another: *“the community doesn't expect [women] to drink alcohol as they have a*  
292 *lot of activities and home chores to carry on and looking after kids”* (IDI #4, Male).

293           In contrast, men's alcohol use was generally tolerated by women and community  
294 members.

295           *“Society expectations and duties differ between men and women, thus making effects of*  
296 *alcohol more severe and sensitive to women because they are depended on a high task of*  
297 *family nurturing. For men after when they have secured money for the family, things tend*  
298 *to run smoothly even when they are drunkards unlike women who fail to take care of the*  
299 *family”* (IDI #7, Female).

300           These gender roles and dissimilar expectations of alcohol use may stem from Moshi  
301 being, as one participant described, *“a patriarchal society who sees it is okay to a man to drink*  
302 *alcohol...But they treat women who drinks alcohol very different from how they consider*  
303 *themselves”* (IDI #9, Female).

304

305 ***Alcohol's Impact on Gendered Responsibilities and Family Life***



306 Respondents noted that contrasting gender responsibilities and alcohol use expectations  
307 created unique consequences when a mother versus a father drank in excess. One respondent  
308 summarized the impact on families:

309 *“If the father is drunkard the family will find it very difficult to meet their [financial]*  
310 *needs. But the responsibility of the day-to-day upbringing of children in the family is of a*  
311 *woman if the mother is drunkard the children will miss out on essential services such as*  
312 *hygiene and cooking healthy food”* (IDI #8, Male).

313 As a result of these unique impacts on families, social perceptions of mothers and fathers who  
314 drank were likewise dissimilar.

315

#### 316 Women who drink are perceived as poor mothers

317 A recurring question arose as a byproduct of traditional gender roles: *“Women are the*  
318 *caretakers of the family if they drink too much alcohol and who will look after the family?”* (IDI  
319 #13, Female). Answering this, a common perception of women who drank alcohol was that their  
320 behavior would negatively interfere with childcare responsibilities – *when a woman embraces*  
321 *too much alcohol she can not take proper care of her family....she will no longer be effective*  
322 *because of too much alcohol”* (IDI #3, Female); *“when mother is drunk, she can’t prepare family*  
323 *food, which have an impact on mental health of their children”* (IDI #7, Female). As a result,  
324 one IDI participant noted that *“the women who drink lose their respect and dignity as mothers in*  
325 *the society”* (IDI #16, Female).

326 A mother’s alcohol use was seen to have a stronger impact on family functioning than the  
327 father’s because of the importance placed on child care. As such, strong opinions and greater  
328 social censure surrounded women who drank –

329 *"Women [who drink] are viewed as morally wrong and bad-mannered. Because the*  
330 *community believe on them and have a lot of expectation, we normally say if the woman*  
331 *is not strong, the whole family is weak. So once women drinks, they will be isolated and*  
332 *discriminated by the members of the community"* (IDI #19, Female).

333

334 Men who drink but still can provide financially face less social censure

335 In opposition to social norms around women, a man who drank but could still provide  
336 financially for their family was seen to have sufficiently fulfilled his role and was given the  
337 proverbial green light to consume alcohol. As one respondent explains, *"when a man has earned*  
338 *money and brings it home even if he drinks too much alcohol the community finds it is okay*  
339 *because he has already fulfilled his responsibility"* (IDI #6, Female). One participant even  
340 described men who go to work intoxicated but face little stigma or social censure due to their  
341 pivotal roles as doctors or teachers in the community –

342 *"In villages, it's difficult to stigmatize these people because they are one of the few*  
343 *professionals that the whole village depends upon. So even those who drink know that*  
344 *they are important and instrumental in the community and that people depend on them*  
345 *for different services like health or education"* (IDI# 3, Female).

346

347 Women who drink are undesirable to marry

348 Interestingly, the association of alcohol use and poor childcare negatively impacted  
349 women who drank even before they were married or pregnant. Because of the aforementioned  
350 perceptions and impacts of women's drinking, respondents commented that women who  
351 consumed alcohol were undesirable for marriage:

352 *"A woman's drinking habit may cause a delay or difficulty in getting married because*  
353 *men are watchful on characters of women they want to marry. If they see that particular*  
354 *woman is into alcohol they [will question] if she will be able to perform duties and*  
355 *activities as a married woman, as a mother to her future family...Men are scared of being*  
356 *left alone with family and children when the woman is busy out there drinking alcohol"*  
357 (IDI #10, Female).

358 The undesirability of women who consume alcohol also relates to community  
359 assumptions of sexual promiscuity, which further makes women eligible for a good marriage.  
360 This was especially true if women drank hard liquor, rather than beer. As one participant  
361 explained:

362 *"When a man drinks alcohol it's cool but when a woman drink alcohol [she] is a hoe. A*  
363 *man who drinks alcohol and he is working he can provide he is a husband material but a*  
364 *woman who drinks alcohol and she is working and can provide she is not a wife*  
365 *material...myself at the university someone can tell me a joke like who will marry a*  
366 *woman like you who drink hard liquor well that is a stigma because I drink hard liquor*  
367 *no one will marry me. So, women who drink hard liquor they are not wife material"* (IDI  
368 #15, Female).

369  
370 ***Alcohol-Related Stigma***

371 Women face more severe alcohol-related stigma than men

372 As was alluded to in the quote above, a persistent thread across many IDIs was the  
373 existence of perceived and experienced alcohol-related stigma. Importantly, in most instances,  
374 the stigmatizing, negative opinions around women who drank were more severe than those

375 surrounding their male counterparts – “*women who drink are stigmatized more than men*” (IDI  
376 #7, Female). This was true even when accounting for similar or even lesser quantities of alcohol  
377 consumed – “*men use alcohol much more than how women use, but women face much more*  
378 *stigma about alcohol use than men in the community*” (IDI #3, Female). Two respondents  
379 described this discrepancy:

380 “*If I sat somewhere with a man who is the same age, me as a woman I drank 2 beer and*  
381 *the man drank 10 beers. The community will find its wrong for me to drink 2 beers but*  
382 *the man is not guilty of drinking 10 beers. So, what the society considers to be wrong*  
383 *drinking alcohol is mostly based on gender that it is wrong for a woman to drink alcohol*  
384 *even if she is an adult*” (IDI #15, Female).

385  
386 “*Woman who drinks is viewed as a person not self-aware and not respectful at all, but a*  
387 *man who drinks is viewed as a successful independent man because he can afford*  
388 *providing for his family and can afford alcohol too, also he is seen as updated man who*  
389 *has connections with potential people he meets when he goes drinking*” (IDI #10,  
390 Female).

391 While not a unanimous belief – two participants stated that “*stigma exists for both who drinks*  
392 *alcohol, whether a men or women*” (IDI #11, Male) – in general, the words participants used to  
393 describe women who drink were harsher and more damaging – “*That value of a respectable*  
394 *woman...is no longer there when she drinks too much*” (IDI #7, Female) than those used to  
395 describe men.

396  
397 Lack of discrimination and isolation surrounding men who drink  
398

399 For men, stigma was either less severe “*society excludes them in making important*  
400 *decisions...society does not trust them with the works*” (IDI# 3, Female) or nonexistent—“*there*  
401 *is no stigma among men who drink alcohol*” (IDI #4, Male). One important excerpt from IDI #9  
402 helps illustrate the relationship surrounding men who drink in Moshi and stigma.

403 “*The stigma in men who drink alcohol is not that much ... His fellow men will not*  
404 *exclude him, they will collaborate working with him, they will laugh and live normal with*  
405 *him. Maybe if his addiction to alcohol...damages the job then that is where there will be*  
406 *a problem. ... When I think of stigmatization it involves alienating someone and refusing*  
407 *to engage with someone just because of excessive alcohol consumption is very minor*  
408 *among men in Tanzania...So, if you see someone being stigmatized maybe it's because he*  
409 *drinks too much alcohol and he doesn't have money but not because of drinking too much*  
410 *alcohol alone*” (IDI #9, Female).

411 This quote highlights the normalization of excessive alcohol use among men leading to  
412 decreased social stigma around their drinking. For men, “*if you are taking care of everything at*  
413 *your place and work, it's never perceived as stigma no matter how much you drink*” (IDI#8,  
414 Male).

415 The perceived stigma that arose from men's alcohol use instead was seen as a poor  
416 reflection on their family instead of themselves—“*men who drink too much alcohol are the ones*  
417 *stigmatizing their families for not caring for their families. They spend all they get on alcohol*  
418 *regardless of their families' needs*” (IDI#1, Female). She continued in summarizing this, saying:

419 “*Society tends to stigmatize [men] because they have despised their families and gave*  
420 *alcohol the first priority...They are seen as silly drunkard people who cannot make*

421 *decisions. And even children tend to disrespect them saying like someone's father is a*  
422 *drunkard person” (IDI#1, Female).*

423

424 Discrimination and isolation surrounding women who drink

425 In contrast to the ambivalent treatment bestowed on men who drink, the stigma around  
426 women was so strong that it led to acts of discrimination, concrete negative actions, violence,  
427 and poor treatment from members of their community:

428 *“When a women drinks alcohol is labeled as a sin, and this is followed by violence such*  
429 *as biting, and harassment. Although men are treated as king, women are treated as slave.*  
430 *It is obvious, to find gender violence in the community especially when a women go*  
431 *against social norms” (IDI #17, Male).*

432 This treatment towards women stands in direct contrast to men who drank alcohol who were  
433 instead *“loved and appreciated by many”*; *“because drinking is seen as a prestige thing... [men*  
434 *were]applauded for drinking” (IDI#16, Female).*

435 Discrimination against women who drink arose mainly as isolation and came from fellow  
436 community members, loved ones, and family members alike:

437 *“I can remember one lady who was well married and blessed with children, I don't know*  
438 *why and when she started drinking but the drinking brought so much trouble in her home*  
439 *to the extent she was divorced by her husband and he took all her children away as he*  
440 *went to marry another woman. She really went through a rough time people around were*  
441 *seeing her as insane as she can't take care of anything. She was not invited to join even*  
442 *in those women gatherings in the street or local church” (IDI #10, Female).*

443

444 *“I had one relative who married a woman who was initially not using alcohol, I don't*  
445 *know what happened; she started using alcohol so much and being aggressive. The*  
446 *family completely excluded her from any activity...from her husband, mother-in-law and*  
447 *even her children, she was not welcomed even to cook and eat together as a family” (IDI*  
448 *#3, Female).*

449

#### 450 Community support and implications on women's health

451 Expressions of empathy or understanding towards women users were almost entirely  
452 absent across all interviews. Instead, women were said to be shown “*no support*” (IDI #1,  
453 Female) from family members or the community. As one female respondent said, “*the*  
454 *community does not even bother to find the reason as to why a woman drinks, they just go*  
455 *straight to judge that she has no manners*” (IDI #3, Female).

456 This gender-based stigma had direct implications on women's health outcomes. As one  
457 patient postulated, it prevented women from disclosing their alcohol use to their providers or  
458 other healthcare professionals – “*If a woman tells her healthcare provider that she has been*  
459 *drinking and feels judged, she might be less inclined to talk about this issue again*” (IDI #2,  
460 Male).

461

#### 462 Stigma's influence on sexual violence

463 The disproportionate perceived and experienced stigma that women face from alcohol  
464 use was perceived to increase their risk of sexual assault and sexual violence. Because of how  
465 they were negatively viewed in society, women who consumed significant amounts of alcohol

466 were seen as being unable, both physically and morally, to refuse men's sexual advances IDI #6  
467 described this pattern, explaining:

468 *"A woman who drinks too much alcohol, the community sees her as a drunker, that*  
469 *woman who can be raped at any time when she is drunk or any man can sleep with her*  
470 *while drunk and she cannot refuse to sleep with any man in need. But the men who drink*  
471 *too much alcohol the community feels it is okay they don't look badly like a woman who*  
472 *drinks too much alcohol"* (IDI #6, Female).

473

#### 474 ***Alcohol and Sexual Violence***

475 Although not included in the interview guide, when discussing the consequences of  
476 alcohol use, sexual assault was a common theme that arose across most IDIs. In all cases except  
477 one, sexual assault was described as men inflicting sexual violence upon women, and alcohol  
478 was seen as a facilitator of this behavior.

479

#### 480 Women face disproportionate alcohol-related sexual harm

481 Similar to stigma, women in Moshi were described as being disproportionately impacted  
482 by sexual violence, especially when under the influence of alcohol use. This sexual violence  
483 further put women in danger of contracting STDs, getting pregnant, or suffering additional  
484 physical and mental harm. Participants described that:

485 *"When a man gets drunk there are some things which are not common to happen to him*  
486 *like being raped but for how women are created it's easy for a drunk woman to be a*  
487 *victim of such violence like being beaten, her things stolen, being raped and forced to do*  
488 *some devastating stuffs which at the end leads to unwanted pregnancies, acquiring STI*



489 *like HIV or syphilis. That's how effects can be different between men and women*” (IDI  
490 #10, Female).

491  
492 *“There was a day when I sent my son to buy groceries on his way back, he told me he*  
493 *saw a woman and a man taking off clothes near the local liquor club he said I don't know*  
494 *why may be the man wants to slaughter the woman*” (IDI #13, Female).

495 As is illustrated by these quotes, alcohol-facilitated sexual violence against women is present in  
496 the Moshi community and exists at significant harm to the women who drink. While the stigma  
497 associated with alcohol use was perceived to increase a woman’s risk of experiencing sexual  
498 violence, she was also seen to be at greater risk of stigma and social harm after experiencing  
499 sexual assault. As described by one participant:

500 *“For a female, once they drink excessively, [they] may end up being raped or tortured by*  
501 *men. And once people know that something embarrassing happen to you, everyone will*  
502 *point finger at you, also they will never respect you*” (IDI #14, Male).

503

504 Alcohol is used as a tool to advance sexual acts

505 Participants noted that some men utilize alcohol as a tool to intoxicate women to get  
506 women to sleep with them. While some described this as a method to decrease inhibitions, most  
507 respondents framed this as being able to *“easily take advantage of the girl”* (IDI #15, Female).

508 Other respondents shared this view, stating:

509 *“Men I think are drinking alcohol to relax and others through drinking alcohol it is*  
510 *their way of getting women. When a man needs a woman he goes to the bar when he*

511 *finds a woman alone, he starts buying alcohol to that woman in order to get her drunk*  
512 *and take her to sleep with him.” (IDI #9, Female)*

513  
514 *“Sometimes when a girl goes out with a man, I have seen men forces girls to drink*  
515 *alcohol. A man will force a girl to drink at least just a glass of wine sometimes men do*  
516 *that in order to easily take advantage of the girl.” (IDI #15, Female).*

517 Some women respondents also commented on their blunted decision-making capacities  
518 while under the influence of alcohol use. This led to sexual acts and other negative consequences  
519 that would normally be unwanted. As two described:

520 *“Women [who are] drunk may sleep with a man which she didn't want to if she was sober*  
521 *and this reckless decision may lead to things like acquiring diseases like HIV, STIs,*  
522 *unwanted pregnancies and can make this lady to go into depression as well” (IDI #6,*  
523 *Female)*

524  
525 *“Many times, you will end up to do things you will not do in your right mind sometimes*  
526 *you may be irresponsible under alcohol influence like sleeping with someone you don't*  
527 *know.” (IDI #15, Female)*

528  
529 Women’s alcohol use is associated with sex work

530  
531 Finally, women's alcohol use appeared to have a sociocultural link with sex work in some  
532 interviews. This relationship was noted even while direct interactions with sex workers were not  
533 present and could underlie the aforementioned connections between alcohol and sexual violence  
534 against women.

535 Two respondents elaborated on alcohol use in the context of sex work, saying those  
 536 consumed alcohol to perform “*smoothly with confidence*” (IDI #3, Female).  
 537 “*Speaking openly the job is prostitution, using her body to please someone and get paid*  
 538 *in return. This brings money, but it's not an easy job to do, and in sound mind it's not*  
 539 *possible to do it that's why they drink alcohol. Alcohol does excite the brain and makes*  
 540 *you see everything is alright and after drinking a woman can do the job well although*  
 541 *will regret later but at least she has gained the money for her needs already.*” (IDI #10,  
 542 Female)

543 In summary, throughout the IDIs there were distinct differences in how Men and Women  
 544 described their perception of use by each gender. A summary of words and phrases, pulled from  
 545 IDIs, describing men and women alcohol users is shown in Table 2. Words describing male users  
 546 generally framed them as being irresponsible and unable to care for their family, but in some  
 547 cases were complimentary, describing them as ‘strong’ and with ‘complete manhood’. In  
 548 comparison, words for women users were much harsher and unanimously negative. Participants  
 549 painted women who drink as unfit to marry, affiliated them with sexual promiscuity, and  
 550 notably, attacked their character and self-worth.

551 *Table 2: Words Used to Describe Unhealthy Alcohol Users*  
 552

|                                         |           | <b>Perceptions</b>                                                                                                                                                                                                                                      |                                                                                                                                                                                                                                                                                                 |
|-----------------------------------------|-----------|---------------------------------------------------------------------------------------------------------------------------------------------------------------------------------------------------------------------------------------------------------|-------------------------------------------------------------------------------------------------------------------------------------------------------------------------------------------------------------------------------------------------------------------------------------------------|
| <b>Gender of Unhealthy Alcohol User</b> |           | Men Respondents                                                                                                                                                                                                                                         | Women Respondents                                                                                                                                                                                                                                                                               |
|                                         | Men Users | <ul style="list-style-type: none"> <li>❖ Cannot be involved in activities or any decision-making process in the community</li> <li>❖ Irresponsible to cater family or social needs</li> <li>❖ Incapable of delivering anything in the family</li> </ul> | <ul style="list-style-type: none"> <li>❖ Stigmatizing their families</li> <li>❖ No real contribution in the family</li> <li>❖ Don't respect themselves or their wives</li> <li>❖ They have despised their families and gave alcohol a first priority</li> <li>❖ Burden to his family</li> </ul> |

|  |                    |                                                                                                                                                                                                                                                                                                                                            |                                                                                                                                                                                                                                                                                                                                                                                                                                                                                                                                                                                                                                                  |
|--|--------------------|--------------------------------------------------------------------------------------------------------------------------------------------------------------------------------------------------------------------------------------------------------------------------------------------------------------------------------------------|--------------------------------------------------------------------------------------------------------------------------------------------------------------------------------------------------------------------------------------------------------------------------------------------------------------------------------------------------------------------------------------------------------------------------------------------------------------------------------------------------------------------------------------------------------------------------------------------------------------------------------------------------|
|  |                    | <ul style="list-style-type: none"> <li>❖ Immature</li> <li>❖ Hopeless</li> <li>❖ They have no points</li> <li>❖ Bullied by the community</li> </ul>                                                                                                                                                                                        | <ul style="list-style-type: none"> <li>❖ Silly drunkard people who cannot make decisions</li> <li>❖ Despised</li> <li>❖ Lacks discipline</li> <li>❖ No self-control</li> <li>❖ Reckless</li> <li>❖ Cause fights</li> <li>❖ Society does not trust them with the works</li> <li>❖ Not...constructive</li> <li>❖ Segregated from making important decisions in the community</li> <li>❖ Fellow men will not exclude him</li> <li>❖ Strong</li> <li>❖ Complete manhood</li> </ul>                                                                                                                                                                   |
|  | <p>Women Users</p> | <ul style="list-style-type: none"> <li>❖ Irresponsible mothers</li> <li>❖ Disgusting!</li> <li>❖ She can't control herself</li> <li>❖ Not well-mannered</li> <li>❖ Disrespected</li> <li>❖ Irresponsible</li> <li>❖ They are after men</li> <li>❖ She can be manipulated by other people, especially men</li> <li>❖ Sex-workers</li> </ul> | <ul style="list-style-type: none"> <li>❖ [Men] cannot marry a woman who drinks alcohol</li> <li>❖ Not wife material</li> <li>❖ Will never marry</li> <li>❖ Spends a lot [of money]</li> <li>❖ They will not take her seriously</li> <li>❖ Ineffective</li> <li>❖ Highly contemptible</li> <li>❖ Not raised properly</li> <li>❖ Careless people</li> <li>❖ Not right at all</li> <li>❖ Bad-mannered</li> <li>❖ Not respectable</li> <li>❖ Hopeless</li> <li>❖ Irresponsible</li> <li>❖ Disturbed</li> <li>❖ People who like conflicts</li> <li>❖ Bad spoken</li> <li>❖ Despised</li> <li>❖ Hated</li> <li>❖ Hoe</li> <li>❖ Prostitutes</li> </ul> |

## 554 *Discussion*

555           This was among the first studies to explore how alcohol-related stigma and sexual  
556 violence differ by gender among patients in Moshi, Tanzania. Our research extends previous  
557 work in Moshi that has identified high rates of local alcohol abuse (36,40), gender differences in  
558 experienced stigma in injury patients (30), and an association between alcohol abuse and past  
559 experiences with sexual violence among women (35). These findings add to the broader base of  
560 literature about alcohol use in LMICs by sharing the critical role gender plays in societal  
561 expectations around alcohol use. Through an in-depth qualitative analysis, we found that  
562 pervasive gender roles created distinct expectations for men's and women's daily responsibilities  
563 and alcohol intake, and underlined differences in alcohol-related stigma. The rigidity of gender  
564 roles here has important social implications that should be considered in future alcohol-related  
565 interventions and care. Primary among these, women in Moshi were found to face  
566 disproportionate stigma and experienced social isolation when drinking as compared to men.  
567 While this stigma may deter intake, for women already suffering from unhealthy alcohol use,  
568 stigma hindered the honest reporting of use, discouraged treatment seeking, and removed the  
569 social support needed to abstain from further negative drinking habits. Finally, alcohol was seen  
570 to contribute to sexual violence, with violence in almost all cases being directed at women. As  
571 such, in addition to gender and stigma, future alcohol-related treatment programs should consider  
572 the association between alcohol use and sexual assault in designing alcohol-reduction  
573 interventions, as this dual diagnosis in women could make certain aspects of care more essential.

574           Our data present the rigidity of traditional gender roles within Moshi, and across  
575 Tanzania, with participants describing men as having greater monetary responsibilities while  
576 women were expected to oversee all household tasks. Our results are supported by existing

577 research based in LMICs where traditional roles earmark women to the household, resulting in  
578 their limited autonomy and decision-making, particularly with financial decisions (16–18,51). In  
579 LMICs especially, this restriction to the household has been linked with a greater prevalence of  
580 intimate partner violence and negative health outcomes for women (14,17). Participants also  
581 described how gender roles contribute to significant differences in community expectations of  
582 alcohol consumption, namely in that women were expected to drink little to no alcohol in order  
583 to effectively care for their children and household. Globally, past literature and established  
584 international frameworks have suggested that variations in alcohol consumption behaviors may  
585 be partly attributable to traditional responsibilities for men and women (52,53). Research  
586 conducted by White et al., for example, suggested the gap between male and female alcohol use  
587 and alcohol-related harm has been narrowing in the United States alongside traditional gender  
588 roles (19,54). In addition, our data identified additional social consequences resulting from  
589 alcohol use as explored more below, with a disproportionate social burden falling on women.  
590 The pronounced gender roles we identified, and the impact they likely wield on women’s health  
591 outcomes given the existing evidence, means that research, health initiatives, and policy changes  
592 in Moshi should be especially cognizant of gender going forwards.

593 Another important finding was the disproportionate stigma women in Moshi faced from  
594 alcohol use even when intake occurred in lesser quantities than men. This finding has been  
595 replicated in the work by Griffin et al., who identified that perceived alcohol-related stigma was  
596 greater against female injury patients in Moshi (30), but also underscores larger gender inequities  
597 present in LMICs. As noted by Medine-Mora, women in LMICs are thought to experience  
598 greater social consequences from alcohol use as it typically does not align with the traditional  
599 behaviors expected of them (14,55). In our study, we found that stigma led to discrimination;

600 women in Moshi with alcohol misuse garnered little understanding or sympathy from community  
601 members, instead being ostracized by friends and family. The stigma centered around women in  
602 Moshi is net negative as it prevents high-risk users from disclosing their alcohol use to  
603 healthcare providers, offset by a slight protective effect in deterring alcohol intake for some. The  
604 effect of stigma on those with substance use disorders (SUDs) has been well studied globally,  
605 linking greater stigma with a lower likelihood of seeking treatment, lower quality of care from  
606 healthcare professionals, and overall poorer health outcomes (56,57). In Moshi, pervasive  
607 structural stigma may exacerbate these effects. Staton et al., for example, identified that 71% of  
608 healthcare practitioners in Moshi either discriminated against or devalued patients with alcohol  
609 use disorders, meaning that those patients likely received poorer care (58). Further, as identified  
610 in this manuscript, the social ostracization of women who drink in Moshi negatively compounds  
611 their efforts to reduce alcohol use, as social support has been identified to be a vital factor in  
612 successful SUD recovery (59–61). The stigma around women’s alcohol use in Moshi places  
613 unique barriers to healthcare delivery and disease recovery for high-risk women users, which  
614 should be noted in ongoing research and programming efforts.

615       Along with the disproportionate burden of stigma, our data revealed that women are  
616 perceived to be at greater risk of experiencing sexual assault and violence while consuming  
617 alcohol than men. In our IDIs, most respondents described men as inflicting sexual violence  
618 upon women, with alcohol use facilitating this behavior. In addition to the perceived increased  
619 risk for sexual assault, interviewees noted that women experience an increased risk of STDs,  
620 stigma after assault, and pregnancy. These findings parallel previous works identifying that rates  
621 of HIV transmission and intimate partner violence (IPV) increase with alcohol consumption in  
622 Sub-Saharan Africa (62–64). Our results are also echoed in past research, where alcohol

623 consumption was found to increase the risk of sexual assault for women, and illuminates the  
624 growing concern that alcohol drives violent sexual behavior globally (63,65–67). The close  
625 relationship between alcohol use and sexual assault in our analysis shows the need for future  
626 interventions in Moshi to incorporate strategies aimed at reducing both gender violence and  
627 alcohol abuse. These types of interventions have already been piloted in several African  
628 countries, with generally positive results (68–71). Murray et al., for example, implemented a  
629 psychotherapy-based treatment program in Zambia aimed at reducing hazardous alcohol use and  
630 IPV, which was found to be more effective than standard care alone in both aims (71). While  
631 other interventions focus on education, empowerment, and motivational interviewing strategies,  
632 throughout all, as Wechsberg et al. highlight, it may be important to incorporate gender violence  
633 and other social determinants of health to optimize interventions (72).

634 As can be seen from this analysis, gender roles and disproportionate experiences of  
635 stigma and sexual violence are all vital factors that should be considered in designing and  
636 implementing effective and culturally appropriate alcohol-reduction interventions in this region.  
637 By incorporating this knowledge in future programming, the needs of women alcohol users in  
638 this region can better be addressed, and alcohol-related harm can be more effectively minimized.

### 639 *Limitations*

640 This analysis should be considered in light of several limitations. First is the lack of  
641 quantitative data with which the results presented here can be triangulated; while stigma and  
642 sexual assault are reported, we are unable to comment on the prevalence or quantify the risk of  
643 these outcomes in relation to alcohol use. However, our qualitative focus allows us to showcase  
644 patients' experiences and perspectives on these topics in a more focused and in-depth manner  
645 than would have been otherwise possible. Further, we believe that our choice to employ one-on-



646 one, gender-matched IDIs for data collection led to a more open and honest discussion on  
647 gender, stigma, and sexual assault, thus establishing more accurate results. While the topics of  
648 gender roles and sexual violence are explored in this manuscript, another limitation is that  
649 questions specifically pertaining to these topics were not included in the interview guide. While  
650 this omission showcases how significant gender roles and sexual assault are in the context of  
651 local alcohol use, it also means that some perspectives may not have been collected. Given the  
652 impact gender roles in Moshi had on alcohol use and consequences, we recommend future  
653 research to explore the impact gender roles have on other health outcomes outside of alcohol  
654 misuse. Even when considering these limitations, this manuscript stands as the first, focused  
655 exploration of gender roles, alcohol-related stigma, and sexual assault through exclusively  
656 qualitative methods in Moshi, Tanzania. Our research provides a deeper understanding of how  
657 these consequences differentially affect men and women alcohol users in Moshi and showcase  
658 the need to consider these elements in future alcohol-reduction-focused programming.

659

## 660 *Conclusion*

661 Men and women have differentiated social roles and expectations in Moshi, Tanzania,  
662 and, resultingly, have different experiences of the social consequences related to alcohol,  
663 including stigma and discrimination. Disproportionate stigma against women who drink also  
664 facilitates sexual violence. Future alcohol-related interventions and programming in this setting  
665 that consider the distinct gendered, social impacts of alcohol use would likely be more  
666 efficacious at lessening alcohol-related harm for women especially.

667

668

669 *References*

670 *Bibliography*

- 671 1. WHO. Global status report on alcohol and health 2018. World Health Organization. 2018;
- 672 2. Lim SS, Vos T, Flaxman AD, Danaei G, Shibuya K, Adair-Rohani H, et al. A comparative  
673 risk assessment of burden of disease and injury attributable to 67 risk factors and risk  
674 factor clusters in 21 regions, 1990-2010: a systematic analysis for the Global Burden of  
675 Disease Study 2010. *Lancet*. 2012 Dec 15;380(9859):2224–60.
- 676 3. Walls H, Cook S, Matzopoulos R, London L. Advancing alcohol research in low-income  
677 and middle-income countries: a global alcohol environment framework. *BMJ Glob  
678 Health*. 2020 Apr 16;5(4):e001958.
- 679 4. Molina PE, Nelson S. Binge drinking’s effects on the body. *Alcohol Res*. 2018;39(1):99–  
680 109.
- 681 5. Casswell S, Thamarangsi T. Reducing harm from alcohol: call to action. *Lancet*. 2009 Jun  
682 27;373(9682):2247–57.
- 683 6. Staton CA, Zhao D, Ginalis EE, Hirshon JM, Sakita F, Swahn MH, et al. Alcohol  
684 Availability, Cost, Age of First Drink, and Its Association with At-Risk Alcohol Use in  
685 Moshi, Tanzania. *Alcohol Clin Exp Res*. 2020 Nov 10;44(11):2266–74.
- 686 7. Mauvais-Jarvis F, Bairey Merz N, Barnes PJ, Brinton RD, Carrero J-J, DeMeo DL, et al.  
687 Sex and gender: modifiers of health, disease, and medicine. *Lancet*. 2020 Aug  
688 22;396(10250):565–82.
- 689 8. McHugh RK, Votaw VR, Sugarman DE, Greenfield SF. Sex and gender differences in  
690 substance use disorders. *Clin Psychol Rev*. 2018 Dec;66:12–23.
- 691 9. Erol A, Karpyak VM. Sex and gender-related differences in alcohol use and its  
692 consequences: Contemporary knowledge and future research considerations. *Drug  
693 Alcohol Depend*. 2015 Nov 1;156:1–13.
- 694 10. Grella CE, Scott CK, Foss MA, Dennis ML. Gender similarities and differences in the  
695 treatment, relapse, and recovery cycle. *Eval Rev*. 2008 Feb;32(1):113–37.
- 696 11. Grella CE. From generic to gender-responsive treatment: changes in social policies,  
697 treatment services, and outcomes of women in substance abuse treatment. *J Psychoactive  
698 Drugs*. 2008 Nov;Suppl 5:327–43.
- 699 12. Greenfield SF, Grella CE. What is “women-focused” treatment for substance use  
700 disorders? *Psychiatr Serv*. 2009 Jul;60(7):880–2.
- 701 13. Pons-Duran C, Lucas A, Narayan A, Dabalen A, Menéndez C. Inequalities in sub-Saharan  
702 African women’s and girls’ health opportunities and outcomes: evidence from the  
703 Demographic and Health Surveys. *J Glob Health*. 2019 Jun;9(1):010410.

- 704 14. Langer A, Meleis A, Knaul FM, Atun R, Aran M, Arreola-Ornelas H, et al. Women and  
705 Health: the key for sustainable development. *Lancet*. 2015 Sep 19;386(9999):1165–210.
- 706 15. Women and health : today’s evidence tomorrow’s agenda [Internet]. [cited 2023 Jun 15].  
707 Available from: <https://apps.who.int/iris/handle/10665/44168>
- 708 16. Furuta M, Salway S. Women’s position within the household as a determinant of maternal  
709 health care use in Nepal. *Int Fam Plan Perspect*. 2006 Mar;32(1):17–27.
- 710 17. Fawole OI, Adeoye IA. Women’s status within the household as a determinant of  
711 maternal health care use in Nigeria. *Afr Health Sci*. 2015 Mar;15(1):217–25.
- 712 18. Azad AD, Charles AG, Ding Q, Trickey AW, Wren SM. The gender gap and healthcare:  
713 associations between gender roles and factors affecting healthcare access in Central  
714 Malawi, June-August 2017. *Arch Public Health*. 2020 Nov 17;78(1):119.
- 715 19. White A, Castle I-JP, Chen CM, Shirley M, Roach D, Hingson R. Converging patterns of  
716 alcohol use and related outcomes among females and males in the united states, 2002 to  
717 2012. *Alcohol Clin Exp Res*. 2015 Sep;39(9):1712–26.
- 718 20. Shield KD, Rehm J. Societal development and the alcohol-attributable burden of disease.  
719 *Addiction*. 2021 Sep;116(9):2326–38.
- 720 21. World Health Organization (WHO). Global status report on alcohol and health 2018  
721 [Internet]. World Health Organization (WHO); 2018 [cited 2021 Nov 21]. Available from:  
722 <https://apps.who.int/iris/bitstream/handle/10665/274603/9789241565639-eng.pdf>
- 723 22. GBD 2016 Alcohol Collaborators. Alcohol use and burden for 195 countries and  
724 territories, 1990-2016: a systematic analysis for the Global Burden of Disease Study 2016.  
725 *Lancet*. 2018 Sep 22;392(10152):1015–35.
- 726 23. Grant BF, Goldstein RB, Saha TD, Chou SP, Jung J, Zhang H, et al. Epidemiology of  
727 DSM-5 Alcohol Use Disorder: Results From the National Epidemiologic Survey on  
728 Alcohol and Related Conditions III. *JAMA Psychiatry*. 2015 Aug;72(8):757–66.
- 729 24. White AM, Hingson RW, Pan I-J, Yi H-Y. Hospitalizations for alcohol and drug  
730 overdoses in young adults ages 18-24 in the United States, 1999-2008: results from the  
731 Nationwide Inpatient Sample. *J Stud Alcohol Drugs*. 2011 Sep;72(5):774–86.
- 732 25. Castle I-JP, Yi H-Y, Hingson RW, White AM. State variation in underreporting of alcohol  
733 involvement on death certificates: motor vehicle traffic crash fatalities as an example. *J*  
734 *Stud Alcohol Drugs*. 2014 Mar;75(2):299–312.
- 735 26. Guy J, Peters MG. Liver disease in women: the influence of gender on epidemiology,  
736 natural history, and patient outcomes. *Gastroenterol Hepatol (N Y)*. 2013 Oct;9(10):633–  
737 9.
- 738 27. Allen NE, Beral V, Casabonne D, Kan SW, Reeves GK, Brown A, et al. Moderate alcohol  
739 intake and cancer incidence in women. *J Natl Cancer Inst*. 2009 Mar 4;101(5):296–305.

- 740 28. Li CI, Chlebowski RT, Freiberg M, Johnson KC, Kuller L, Lane D, et al. Alcohol  
741 consumption and risk of postmenopausal breast cancer by subtype: the women's health  
742 initiative observational study. *J Natl Cancer Inst.* 2010 Sep 22;102(18):1422–31.
- 743 29. Shield KD, Soerjomataram I, Rehm J. Alcohol use and breast cancer: A critical review.  
744 *Alcohol Clin Exp Res.* 2016 Jun;40(6):1166–81.
- 745 30. Griffin SM, Karia FP, Zimmerman A, Minnig MCC, Swahn M, Makelarski J, et al. A  
746 Mixed-Methods Study: Sex Differences in Experiences of Stigma Associated With  
747 Alcoholism and Alcohol Use Disorders Among Injury Patients in Tanzania. *Alcohol Clin*  
748 *Exp Res.* 2020 Aug 9;44(8):1700–7.
- 749 31. Nolen-Hoeksema S. Gender differences in risk factors and consequences for alcohol use  
750 and problems. *Clin Psychol Rev.* 2004 Dec;24(8):981–1010.
- 751 32. McCrady BS, Epstein EE, Fokas KF. Treatment interventions for women with alcohol use  
752 disorder. *Alcohol Res.* 2020 Jul 30;40(2):08.
- 753 33. Connery HS, McHugh RK, Reilly M, Shin S, Greenfield SF. Substance Use Disorders in  
754 Global Mental Health Delivery: Epidemiology, Treatment Gap, and Implementation of  
755 Evidence-Based Treatments. *Harv Rev Psychiatry.* 2020;28(5):316–27.
- 756 34. Sommer M, Kaaya S, Kajula L, Marwerwe G, Hamisi H, Parker R. Social and structural  
757 determinants of youth alcohol use in Tanzania: The role of gender, social vulnerability and  
758 stigma. *Glob Public Health.* 2021 Jan;16(1):75–87.
- 759 35. Ghebremichael M, Paintsil E, Larsen U. Alcohol abuse, sexual risk behaviors, and  
760 sexually transmitted infections in women in Moshi urban district, northern Tanzania. *Sex*  
761 *Transm Dis.* 2009 Feb;36(2):102–7.
- 762 36. Francis JM, Weiss HA, Mshana G, Baisley K, Grosskurth H, Kapiga SH. The  
763 Epidemiology of Alcohol Use and Alcohol Use Disorders among Young People in  
764 Northern Tanzania. *PLoS ONE.* 2015 Oct 7;10(10):e0140041.
- 765 37. Mitsunaga T, Larsen U. Prevalence of and risk factors associated with alcohol abuse in  
766 Moshi, northern Tanzania. *J Biosoc Sci.* 2008 May;40(3):379–99.
- 767 38. Pauley A, Thatcher EC, Sarafian JT, Zadey S, Shayo F, Mmbaga BT, et al. Alcohol Use  
768 among Emergency Medicine Department Patients in Tanzania: A Comparative Analysis  
769 of Injury Versus Non-Injury Patients. *medRxiv.* 2023 May 4;
- 770 39. Mushi D, Hanlon C, Francis JM, Candida M, Demissie M, Teferra S. Adaptation of a  
771 model for integration of interventions for alcohol use disorders in primary health care in  
772 Tanzania. *BMC Prim Care.* 2023 Apr 21;24(1):106.
- 773 40. Mushi D, Moshiro C, Hanlon C, Francis JM, Teferra S. Missed opportunity for alcohol  
774 use disorder screening and management in primary health care facilities in northern rural  
775 Tanzania: a cross-sectional survey. *Subst Abuse Treat Prev Policy.* 2022 Jul 6;17(1):50.

- 776 41. Pauley A, Buono M, West K, Metcalf M, Rent S, Kilasara J, et al. A Mixed-Methods  
777 Comparison of Gender Differences in Alcohol Consumption and Drinking Characteristics  
778 among Patients in Moshi, Tanzania. medRxiv. 2023 May 18;
- 779 42. Staton CA, Msilanga D, Kiwango G, Vissoci JR, de Andrade L, Lester R, et al. A  
780 prospective registry evaluating the epidemiology and clinical care of traumatic brain  
781 injury patients presenting to a regional referral hospital in Moshi, Tanzania: challenges  
782 and the way forward. *Int J Inj Contr Saf Promot.* 2017 Mar;24(1):69–77.
- 783 43. KCMC. About Us: The Kilimanjaro Christian Medical Centre [Internet]. 2023 [cited 2023  
784 Aug 8]. Available from: <https://www.kcmc.ac.tz/about>
- 785 44. Cherpitel CJ, Ye Y, Bond J, Rehm J, Poznyak V, Macdonald S, et al. Multi-level analysis  
786 of alcohol-related injury among emergency department patients: a cross-national study.  
787 *Addiction.* 2005 Dec;100(12):1840–50.
- 788 45. Alcohol and Injury in Emergency Departments: Summary of the Report from the WHO  
789 Collaborative Study on Alcohol and Injuries. Geneva, Switzerland: World Health  
790 Organization; 2007.
- 791 46. Staton CA, Vissoci JRN, Toomey N, Abdelgadir J, Chou P, Haglund M, et al. The impact  
792 of alcohol among injury patients in Moshi, Tanzania: a nested case-crossover study. *BMC*  
793 *Public Health.* 2018 Feb 21;18(1):275.
- 794 47. Hennink M, Kaiser BN. Sample sizes for saturation in qualitative research: A systematic  
795 review of empirical tests. *Soc Sci Med.* 2022 Jan;292:114523.
- 796 48. McQueen K, Namey E, Guest G. *Applied Thematic Analysis.* 2014, editor. SAGE  
797 Publications Inc; 2014.
- 798 49. Subu MA, Wati DF, Netrida N, Priscilla V, Dias JM, Abraham MS, et al. Types of stigma  
799 experienced by patients with mental illness and mental health nurses in Indonesia: a  
800 qualitative content analysis. *Int J Ment Health Syst.* 2021 Oct 18;15(1):77.
- 801 50. Simonsen C, Aminoff SR, Vaskinn A, Barrett EA, Faerden A, Ueland T, et al. Perceived  
802 and experienced stigma in first-episode psychosis: A 1-year follow-up study. *Compr*  
803 *Psychiatry.* 2019 Nov;95:152134.
- 804 51. Minde J. Analysis of Gender Roles within Chagga Households that Practice Ripe Banana  
805 Street Selling in Moshi Rural, Tanzania. *Developing Country Studies.* 2015;5(8).
- 806 52. Wilsnack RW, Vogeltanz ND, Wilsnack SC, Harris TR, Ahlström S, Bondy S, et al.  
807 Gender differences in alcohol consumption and adverse drinking consequences: cross-  
808 cultural patterns. *Addiction.* 2000 Feb;95(2):251–65.
- 809 53. WHO. *Global Strategy to Reduce the Harmful Use of Alcohol.* Geneva: World Health  
810 Organization; 2010.
- 811 54. White AM. Gender differences in the epidemiology of alcohol use and related harms in

- 812 the united states. *Alcohol Res.* 2020 Oct 29;40(2):01.
- 813 55. Medina-Mora ME. Women and alcohol in developing countries. *Salud Mental.*  
814 2001;24(2):3–10.
- 815 56. Zwick J, Appleseth H, Arndt S. Stigma: how it affects the substance use disorder patient.  
816 *Subst Abuse Treat Prev Policy.* 2020 Jul 27;15(1):50.
- 817 57. Finn SW, Mejldal A, Nielsen AS. Public stigma and treatment preferences for alcohol use  
818 disorders. *BMC Health Serv Res.* 2023 Jan 24;23(1):76.
- 819 58. Staton CA, Vissoci JRN, Wojcik R, Hirshon JM, Mvungi M, Mmbaga BT, et al.  
820 Perceived barriers by health care providers for screening and management of excessive  
821 alcohol use in an emergency department of a low-income country. *Alcohol.* 2018  
822 Sep;71:65–73.
- 823 59. McCrady BS. To have but one true friend: implications for practice of research on alcohol  
824 use disorders and social network. *Psychol Addict Behav.* 2004 Jun;18(2):113–21.
- 825 60. Havassy BE, Hall SM, Wasserman DA. Social support and relapse: commonalities among  
826 alcoholics, opiate users, and cigarette smokers. *Addict Behav.* 1991;16(5):235–46.
- 827 61. Day E, Copello A, Karia M, Roche J, Grewal P, George S, et al. Social network support  
828 for individuals receiving opiate substitution treatment and its association with treatment  
829 progress. *Eur Addict Res.* 2013 Feb 7;19(4):211–21.
- 830 62. Bello B, Moultrie H, Somji A, Chersich MF, Watts C, Delany-Moretlwe S. Alcohol use  
831 and sexual risk behaviour among men and women in inner-city Johannesburg, South  
832 Africa. *BMC Public Health.* 2017 Jul 4;17(Suppl 3):548.
- 833 63. Wolff B, Busza J, Bufumbo L, Whitworth J. Women who fall by the roadside: gender,  
834 sexual risk and alcohol in rural Uganda. *Addiction.* 2006 Sep;101(9):1277–84.
- 835 64. Morojele NK, Brook JS, Kachieng'a MA. Perceptions of sexual risk behaviours and  
836 substance abuse among adolescents in South Africa: a qualitative investigation. *AIDS*  
837 *Care.* 2006 Apr;18(3):215–9.
- 838 65. Abbey A, Zawacki T, Buck PO, Clinton AM, McAuslan P. Alcohol and sexual assault.  
839 *Alcohol Res Health.* 2001;25(1):43–51.
- 840 66. King G, Flisher AJ, Noubary F, Reece R, Marais A, Lombard C. Substance abuse and  
841 behavioral correlates of sexual assault among South African adolescents. *Child Abuse*  
842 *Negl.* 2004 Jun;28(6):683–96.
- 843 67. World Health Organization. Alcohol use and sexual risk behaviour: a cross-cultural study  
844 in eight countries [Internet]. World Health Organization; 2005 [cited 2023 May 25].  
845 Available from: <https://apps.who.int/iris/handle/10665/43122>
- 846 68. Wechsberg WM, Jewkes R, Novak SP, Kline T, Myers B, Browne FA, et al. A brief

- 847 intervention for drug use, sexual risk behaviours and violence prevention with vulnerable  
848 women in South Africa: a randomised trial of the Women's Health CoOp. *BMJ Open*.  
849 2013 May 28;3(5).
- 850 69. Manyapelo T, Van den Borne B, Ruiter RAC, Sifunda S, Reddy P. Effectiveness of a  
851 Health Behavioural Intervention Aimed at Reduction of Risky Sexual Behaviours among  
852 Young Men in the KwaZulu-Natal Province, South Africa. *Int J Environ Res Public*  
853 *Health*. 2019 May 31;16(11).
- 854 70. Wagman JA, Gray RH, Campbell JC, Thoma M, Ndyanabo A, Ssekasanvu J, et al.  
855 Effectiveness of an integrated intimate partner violence and HIV prevention intervention  
856 in Rakai, Uganda: analysis of an intervention in an existing cluster randomised cohort.  
857 *Lancet Glob Health*. 2015 Jan;3(1):e23-33.
- 858 71. Murray LK, Kane JC, Glass N, Skavenski van Wyk S, Melendez F, Paul R, et al.  
859 Effectiveness of the Common Elements Treatment Approach (CETA) in reducing intimate  
860 partner violence and hazardous alcohol use in Zambia (VATU): A randomized controlled  
861 trial. *PLoS Med*. 2020 Apr 17;17(4):e1003056.
- 862 72. Wechsberg WM, van der Drift I, Howard BN, Myers B, Browne FA, Bonner CP, et al.  
863 Gender and context matter: behavioral and structural interventions for people who use  
864 alcohol and other drugs in africa. *Int J Environ Res Public Health*. 2022 Jul 16;19(14).
